# Supplementary material
Source: PubMed Central journal article supplement (PMC4746687)
Supplement: supp_tpc.15.00898_TPC2015-00898-RAR1_Supplemental_Data.pdf [file supp_tpc.15.00898_TPC2015-00898-RAR1_Supplemental_Data.pdf]

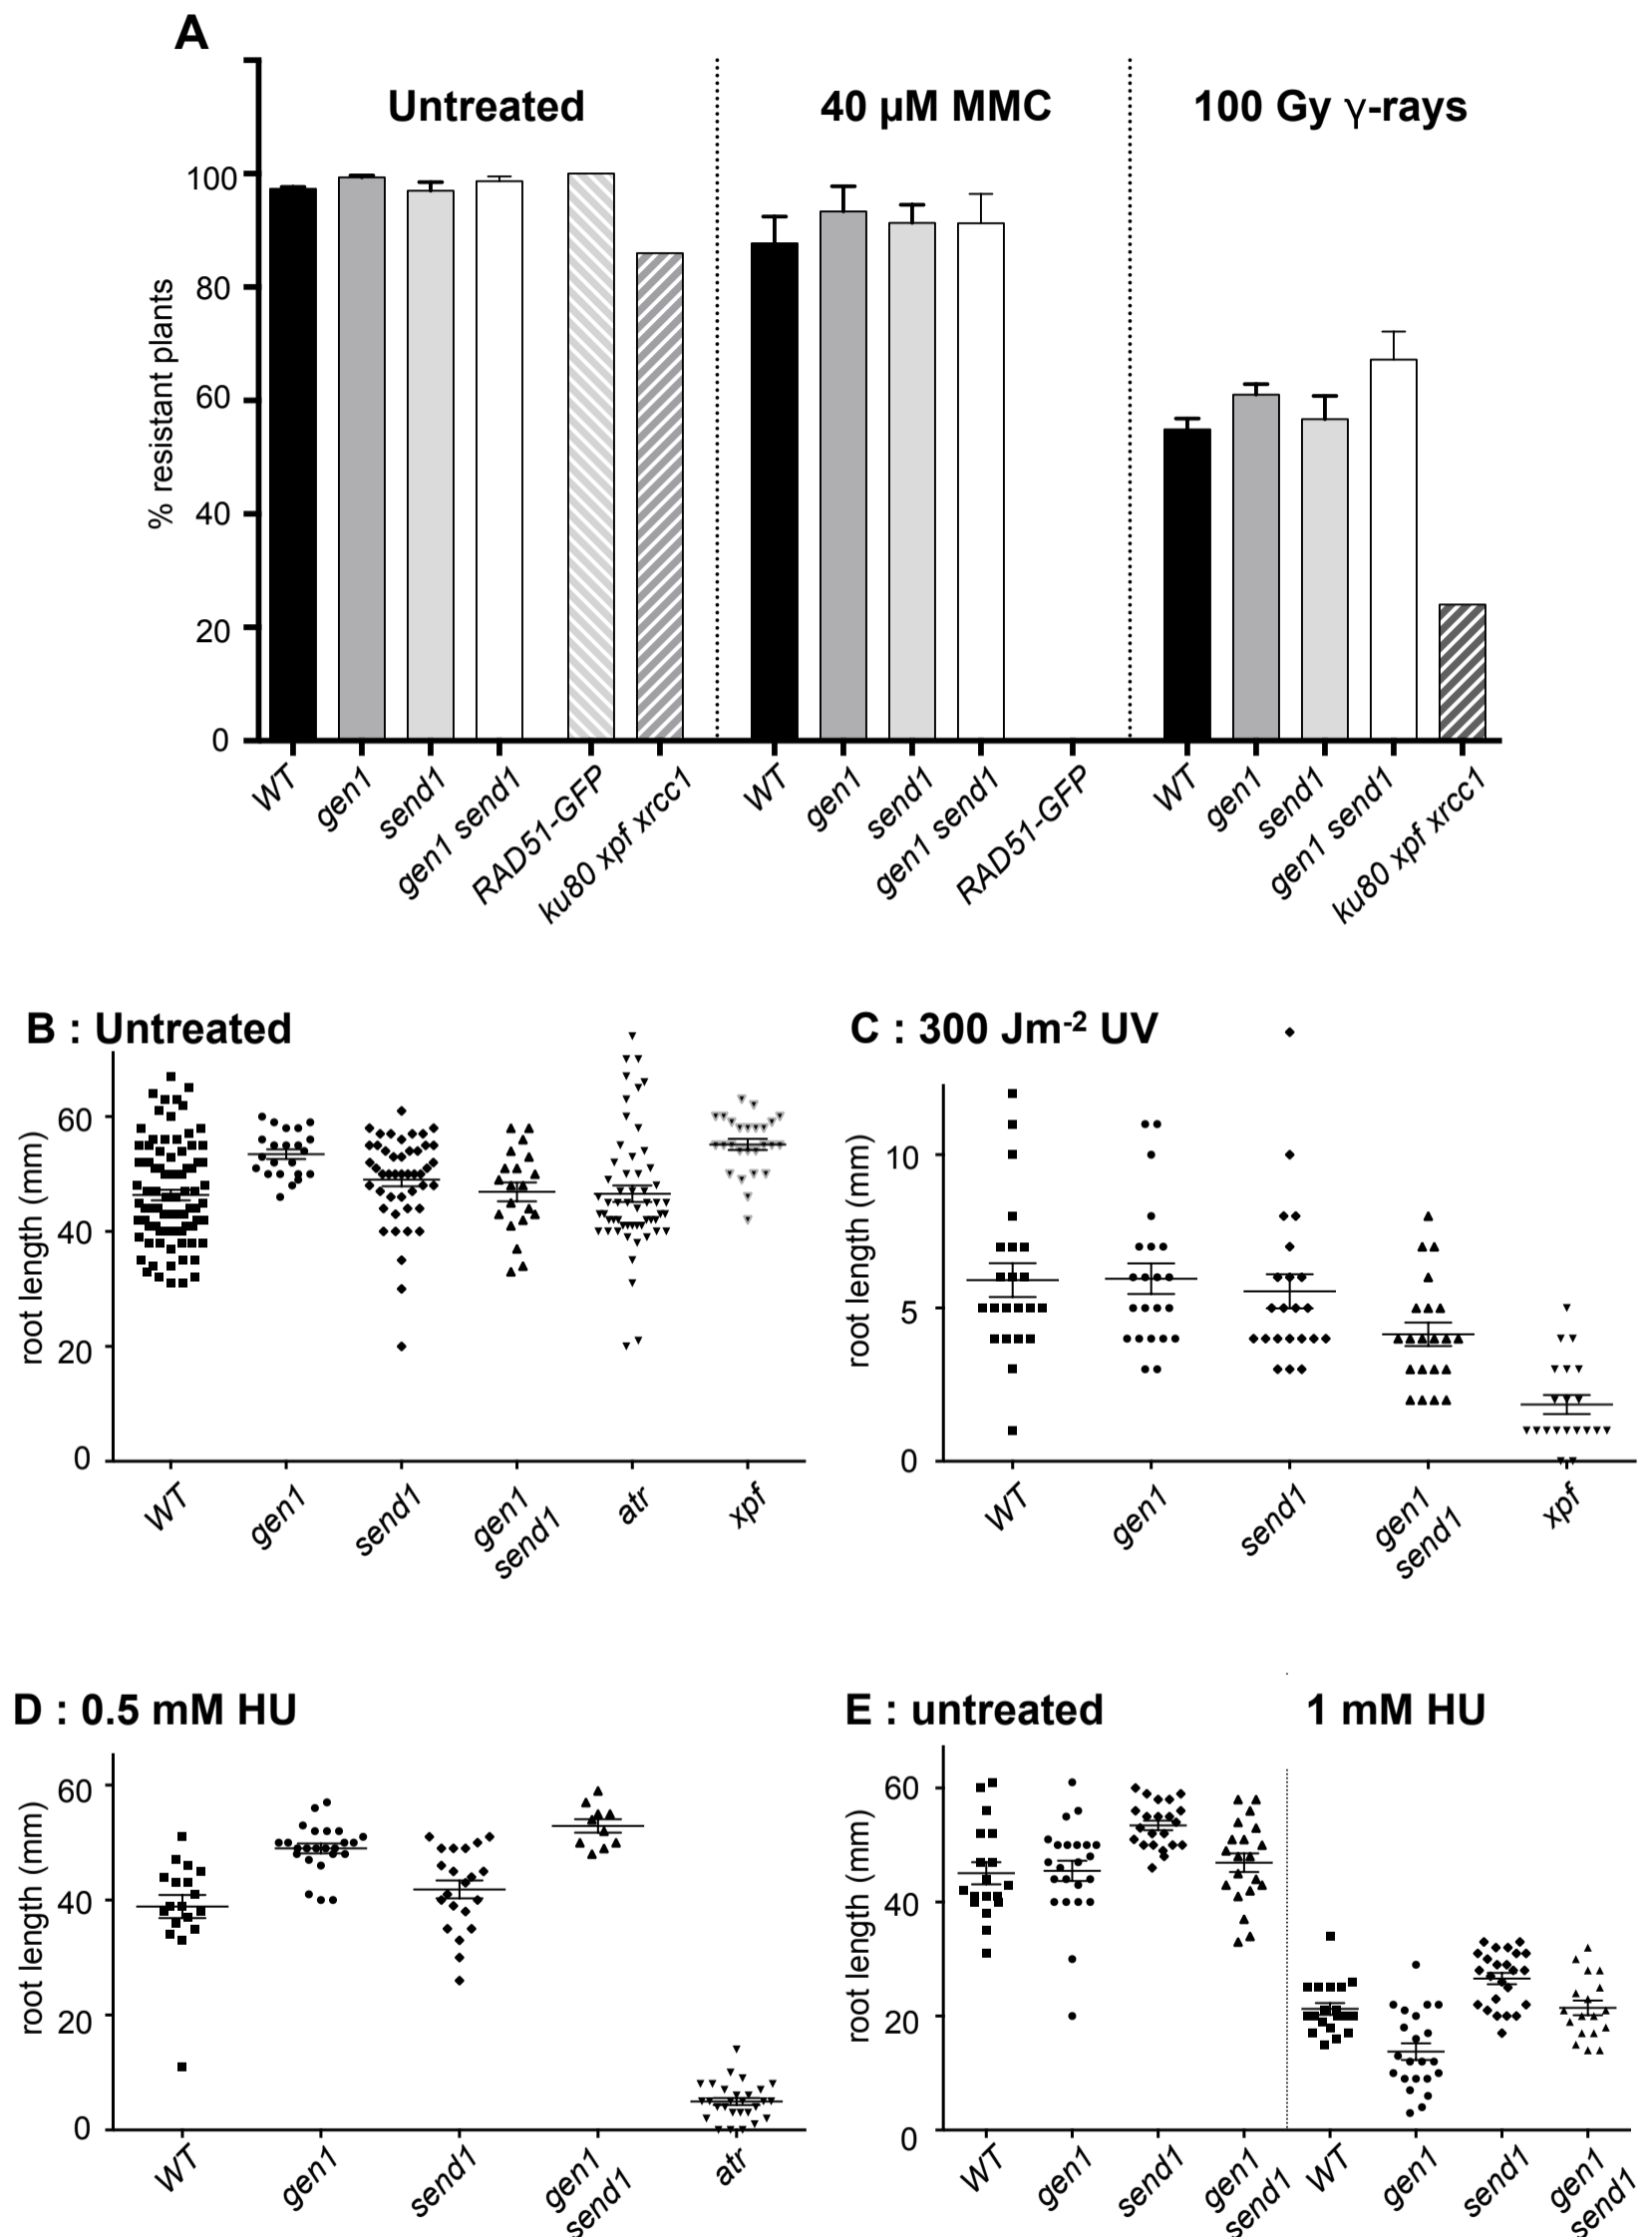

**Supplemental Figure 2. Sensitivity of *gen1*, *send1* and *gen1 send1* to DNA damage.**

(A) Sensitivities to MMC and gamma-rays. Positive controls are the dominant-negative RAD51-GFP and *ku80 xpf xrcc1* knockout plants. Sensitivities were analysed by counting leaves of two-week old seedlings and scoring those with >3 true leaves as resistant. Data is from scoring 100 plants in each case with 3 replicates of each except for WT+MMC and *send1* +10 Gy gamma-rays (2 replicates each). *RAD51-GFP* and *ku80 xpf xrcc1* controls are from single experiments. HU-treated and UV-treated. Root growth of untreated (B), UV-irradiated (C) and HU treated (D, E) plants. *xpf* and *atr* mutant plants were included as positive controls for sensitivity to UV and HU respectively (B, C, D). Individual plant measurements showing means +SEM from >18 plants in each case (points on graphs are individual plant measurements).

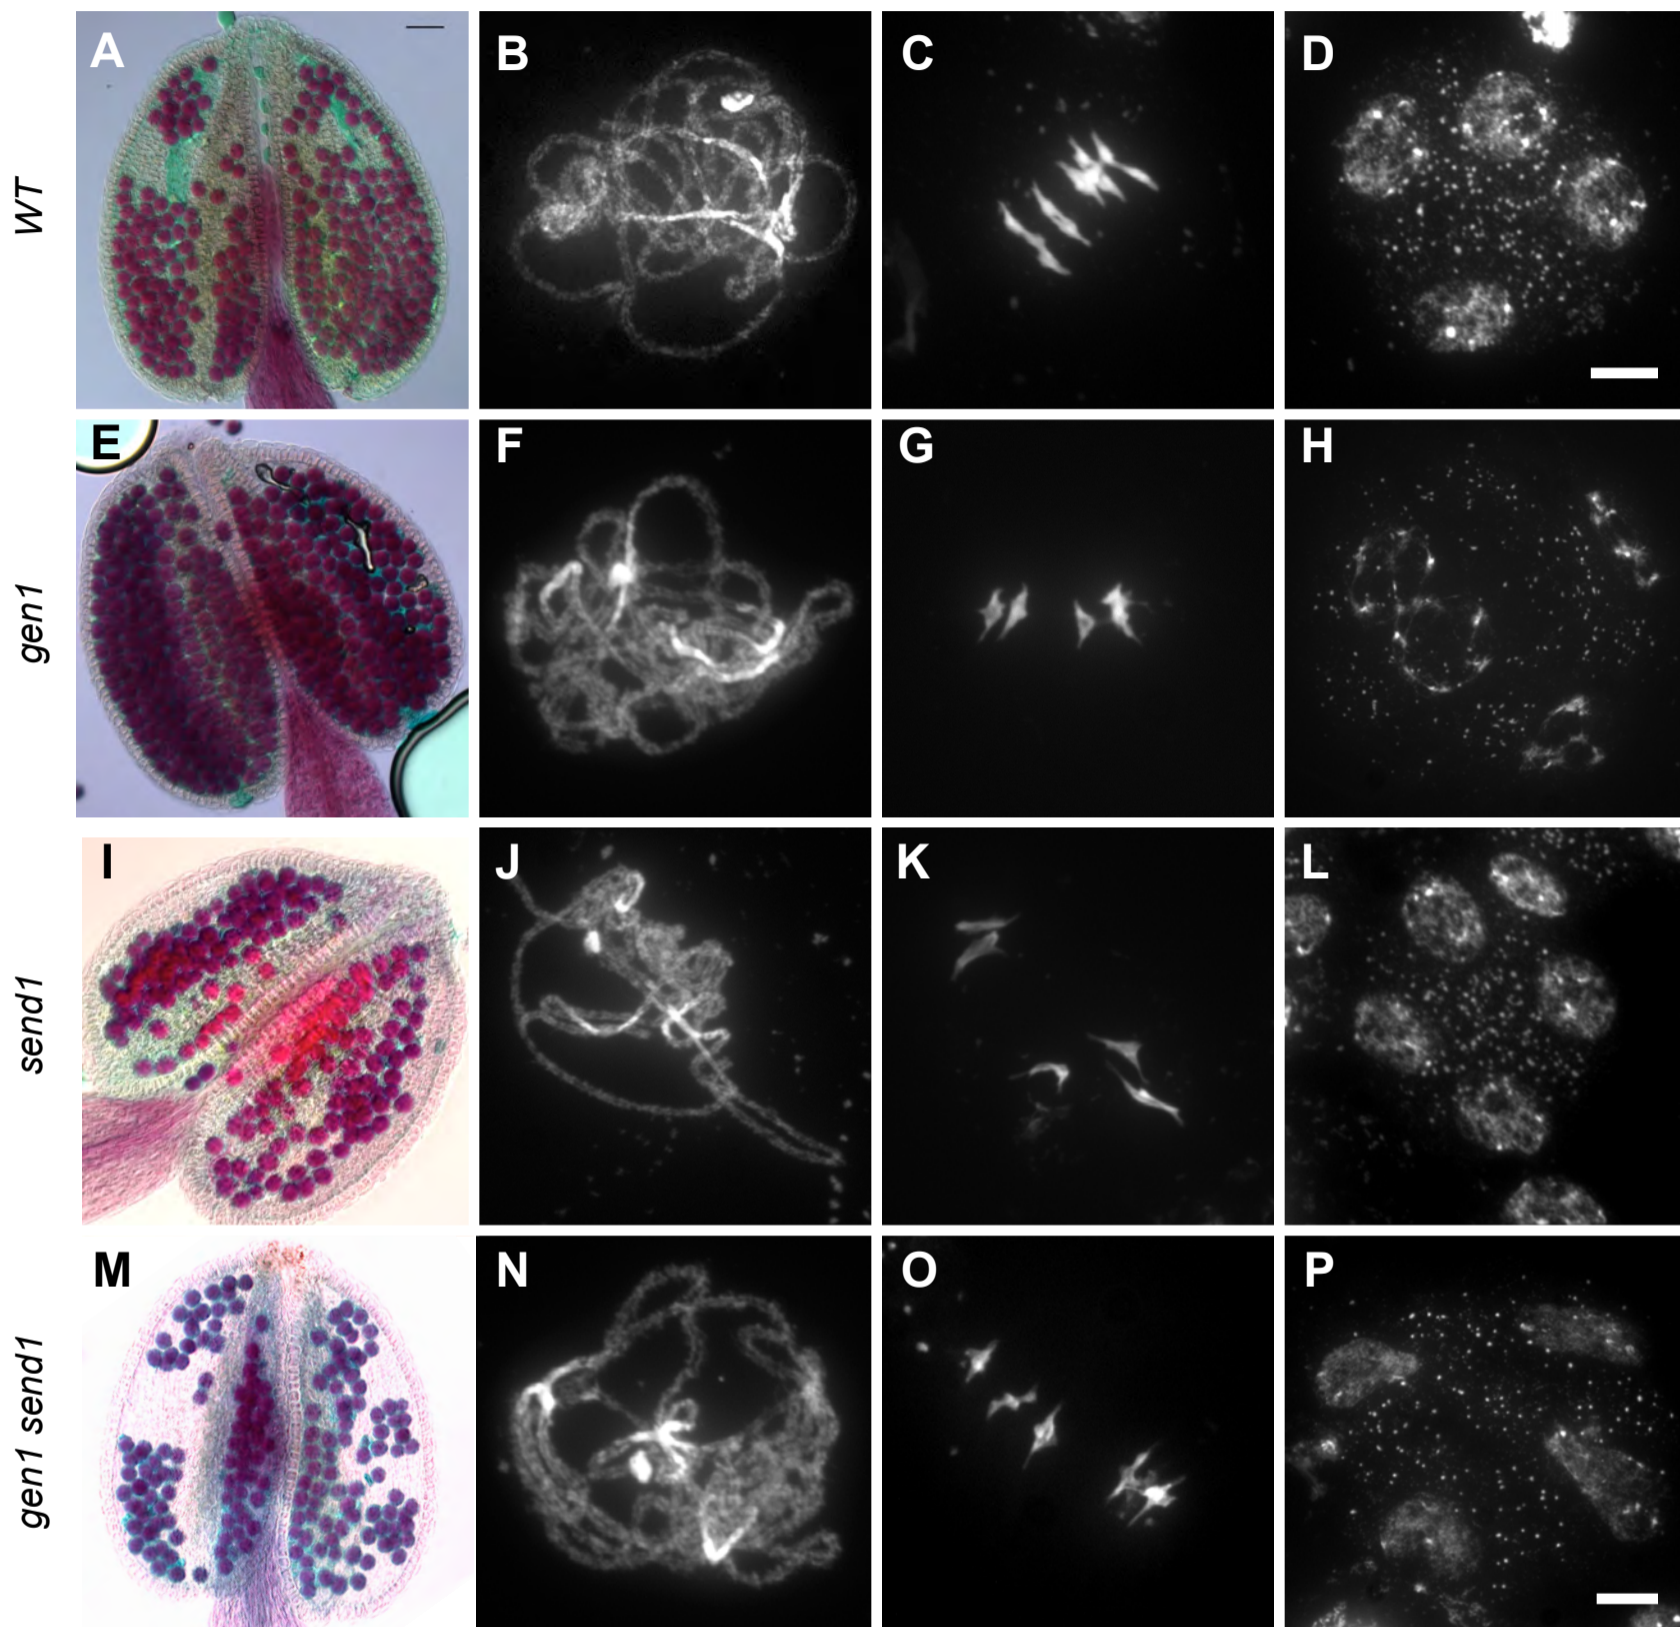

**Supplemental Figure 3. Pollen viability and Meiosis in WT and mutant plants.** Pollen viability and Meiotic progression in WT (A to D), *gen1* (E to H), *send1* (I to L) and *gen1 send1* (M to P). A, E, I, M: Alexander staining showing viable pollen (purple-red). DAPI staining of pollen mother cell nuclei showing full synapsis at pachytene (B, F, J, N), 5 bivalents at metaphase I (C, G, K, O) and tetrads showing four meiotic products (D, H, L, P). (N = 28 (*gen1*), 36 (*send1*) and 30 (*gen1 send1*)). (Scale Bar: 10  $\mu$ m).

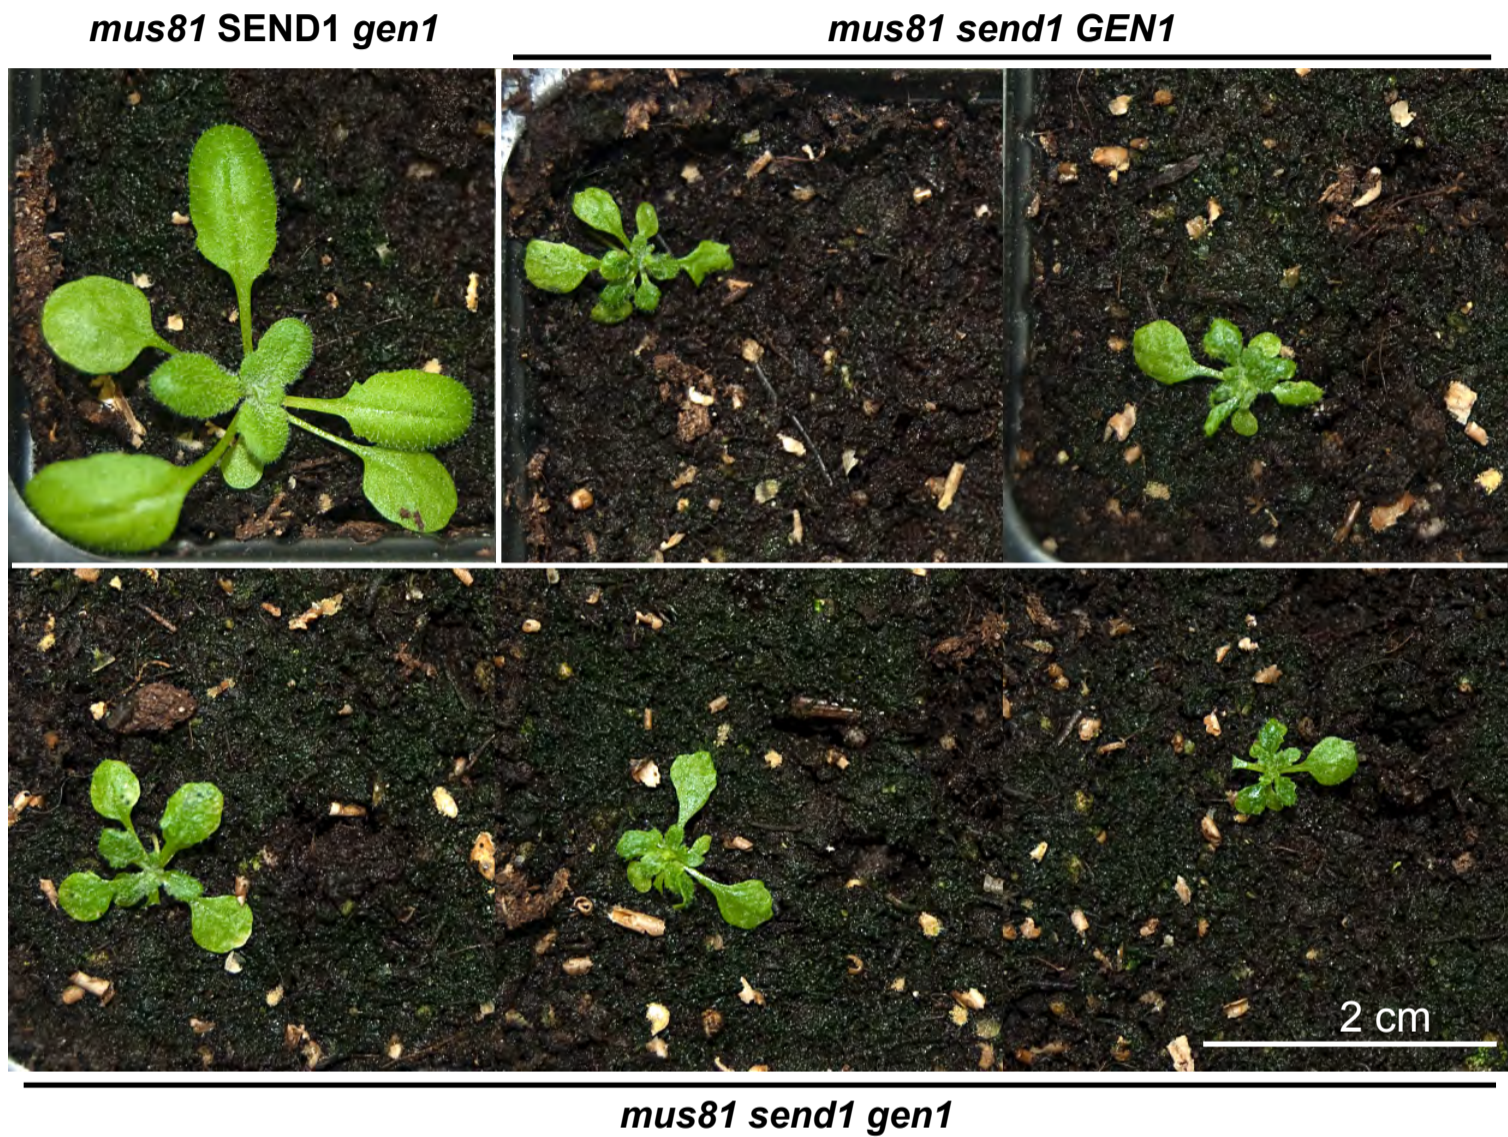

**Supplemental Figure 4. Developmental defects in double and triple mutant plants.**

The triple *mus81 send1 gen1* mutant shows similar growth defects to *mus81 send1* plants. 3-week-old plants. A 2cm scale bar is shown at the bottom right.

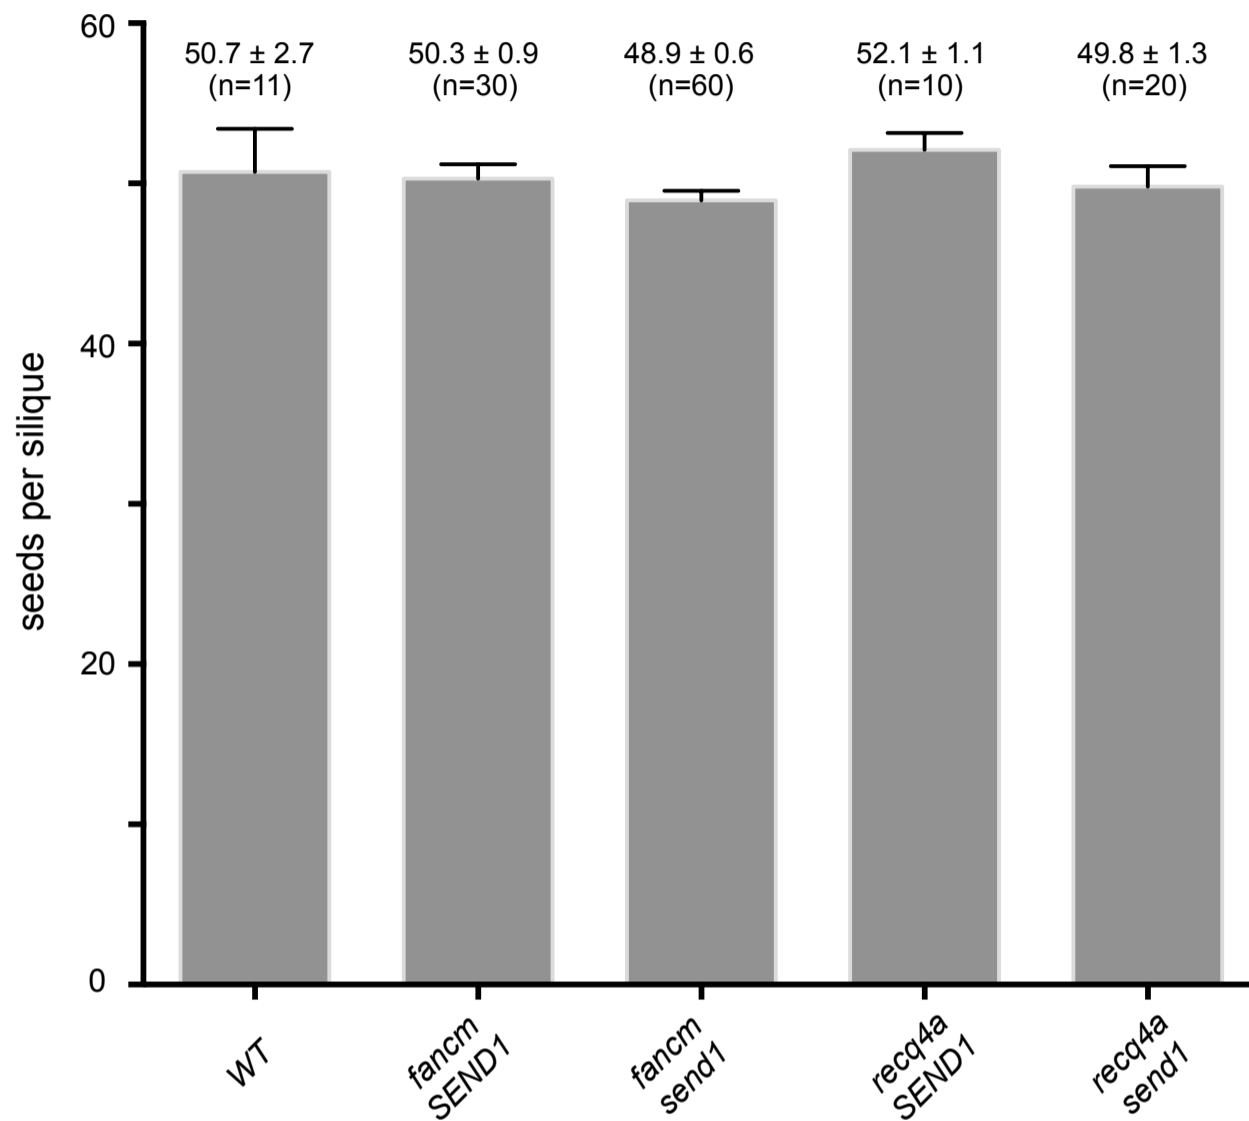

**Supplemental Figure 5. Fertility of *fancm send1* and *recq4a send1* mutants.** Mean (±SEM) numbers of seeds per silique in wild-type, *fancm*, *fancm send1*, *recq4A*, and *recq4A send1* mutants.

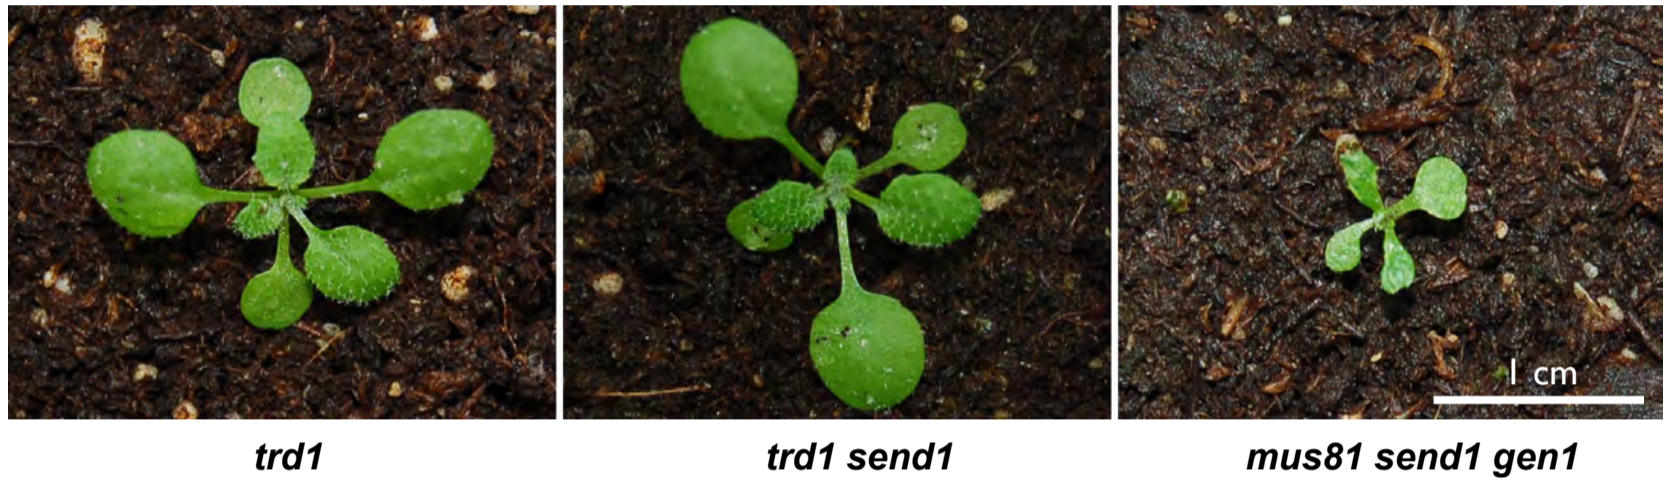

**Supplemental Figure 6. Growth of *trd1* and *trd1 send1* mutants.**

The single *trd1* and double *trd1 send1* mutants grow normally. The severe growth phenotype of the *mus81 send1 gen1* mutant is shown for comparison. Two-week old plants. A 1cm scale bar is shown at the bottom right.

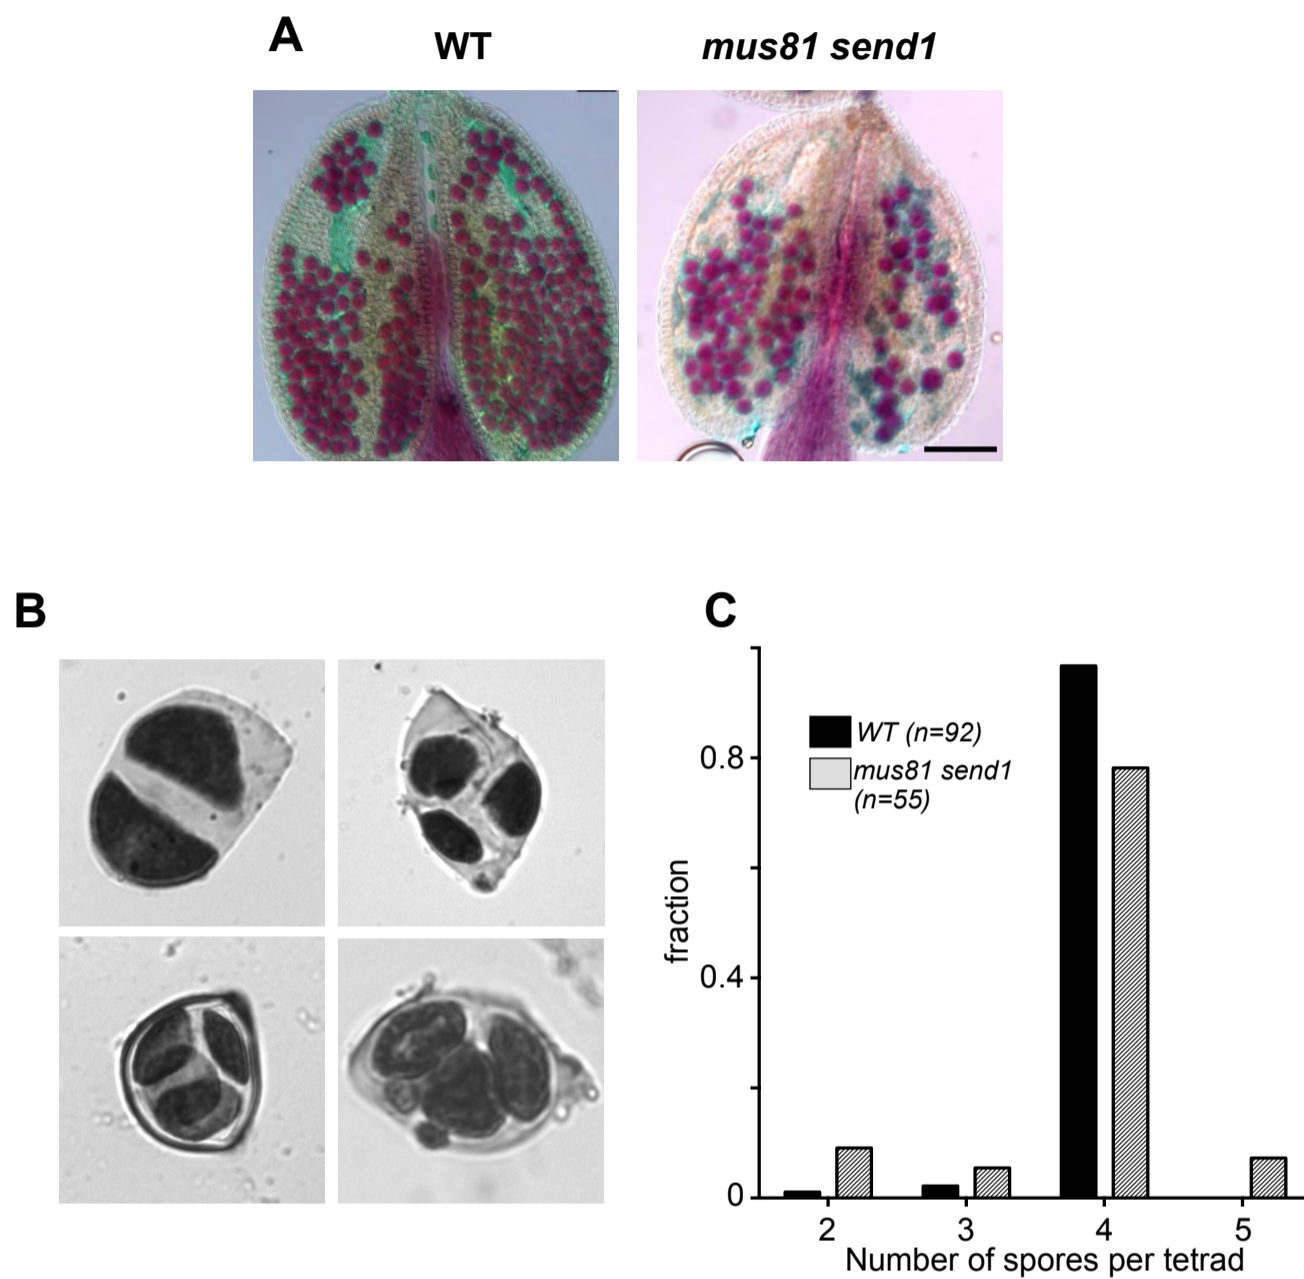

**Supplemental Figure 7. Pollen viability and tetrad analysis in *mus81 send1* mutants**  
**(A)** Viable (purple) and inviable (green) Alexander staining of pollen from WT and *mus81 send1* anthers. **(B)** and **(C)** Tetrads resulting from male meiosis in wild-type and *mus81 send1* plants. Meiotic products were stained with toluidine blue and numbers of normal tetrads and aberrant dyads, triads and pentads monitored. A 100 $\mu$ m scale bar is included at bottom right.

**Supplemental Table 1.**PCR primers used for characterising *gen1* and *send1* T-DNA mutants

| <b>GEN1</b>                   |                         |
|-------------------------------|-------------------------|
| <b>Primer Name</b>            | <b>Sequence</b>         |
| a                             | TTAAGGGTTTCGTCCTTAAAC   |
| b                             | TTCAGAAAACCTCACGAACAAT  |
| c                             | ATGCTTGCATTACTCCTGATA   |
| d                             | TCGTATTGATCACACAACAAA   |
| TAG6 (T-DNA Left Border)      | CACTCAGTCTTTCATCTACGGCA |
| <b>SEND1</b>                  |                         |
| <b>Primer Name</b>            | <b>Sequence</b>         |
| e                             | AGCCTTGTAAGAAGACTTTCC   |
| f                             | CGTAGCAAACAACATAACCTC   |
| g                             | CTCAAAGAAATATGGGGTCT    |
| h                             | ACTCAAAGAACTGATGGCATA   |
| i ( <i>send1-1</i> reverse)   | CACCTGCTTGATCTCTTCCAG   |
| j                             | CAAGATCAACTGAGGTTGAAG   |
| k                             | TCATAGGATAATGTCTTTCCTGA |
| l ( <i>send1-1</i> forward)   | TATGCCTTGGTCAGTGGAAG    |
| Lba1 (SALK T-DNA Left Border) | TGGTTCACGTAGTGGGCCATCG  |
